# Supplementary material
Source: Springer Nature journal article supplement (https://www.springermedizin.de/resource/supplementary/13049_2008_28_MOESM2_ESM.pdf/9665858)
Supplement: MOESM2 [file 9665858]

**Table 2 - main medical problem in MEM missions**

|                                                  | n   | %      |
|--------------------------------------------------|-----|--------|
| Medical problem in stable patient                | 41  | 13.8 % |
| Intoxication with heroine                        | 31  | 10.4 % |
| Suspected stroke                                 | 29  | 9.7 %  |
| Fractured proximal end of femur                  | 27  | 9.1 %  |
| Trauma due to traffic accident, fall or violence | 25  | 8.4 %  |
| Suspected myocardial infarction                  | 21  | 7.0 %  |
| Convulsions (fever in children excluded)         | 20  | 6.7 %  |
| Cardiac arrest                                   | 20  | 6.7 %  |
| Abominal pain                                    | 17  | 5.7 %  |
| Suspected pulmonary disease                      | 14  | 4.7 %  |
| Intoxication (heroine excluded)                  | 12  | 4.0 %  |
| Psychatric disease                               | 11  | 3.7 %  |
| Minor wound or burn injury                       | 7   | 2.3 %  |
| Suspected heart failure                          | 7   | 2.3 %  |
| Child with fever                                 | 6   | 2.0 %  |
| Symptoms related to pregnancy                    | 4   | 1.3 %  |
| Other symptom                                    | 4   | 1.3 %  |
| Convulsions (suspected due to fever in child)    | 2   | 0.7 %  |
|                                                  | 298 | 100.0% |
